# Supplementary material
Source: MDPI journal article supplement (https://www.mdpi.com/2077-0472/11/3/254)
Supplement: s1 [file s1]

Annotation in Gene Ontology database

| Categories         | %     |
|--------------------|-------|
| Biological Process | 7.47  |
| Cellular Componen  | 8.76  |
| Molecular Function | 7.89  |
| no hit             | 75.89 |

| Biological Process                            | %     |
|-----------------------------------------------|-------|
| metabolic process                             | 35.04 |
| cellular process                              | 12.53 |
| biological regulation                         | 11.56 |
| response to stimulus                          | 8.88  |
| localization                                  | 6.67  |
| developmental process                         | 3.03  |
| cellular component organisation or biogenesis | 2.29  |
| multicellular organismal process              | 1.15  |
| other                                         | 2.35  |
| unclassified                                  | 16.49 |

| Cellular Component         | %     |
|----------------------------|-------|
| cell part                  | 46.92 |
| organelle                  | 23.78 |
| membrane part              | 8.16  |
| ptotein-containing complex | 6.18  |
| membrane                   | 5.67  |
| organelle part             | 2.8   |
| extracellular region       | 2.42  |
| cell junction              | 1.01  |
| other                      | 0.49  |
| unclassified               | 2.57  |

| Molecular Function               | %     |
|----------------------------------|-------|
| catalytic activity               | 46.57 |
| binding                          | 29.92 |
| transporter activity             | 4.49  |
| transcription regulator activity | 3.47  |
| structural molecule activity     | 2.32  |
| molecular function regulator     | 1.34  |
| other                            | 0.75  |
| unclassified                     | 11.14 |

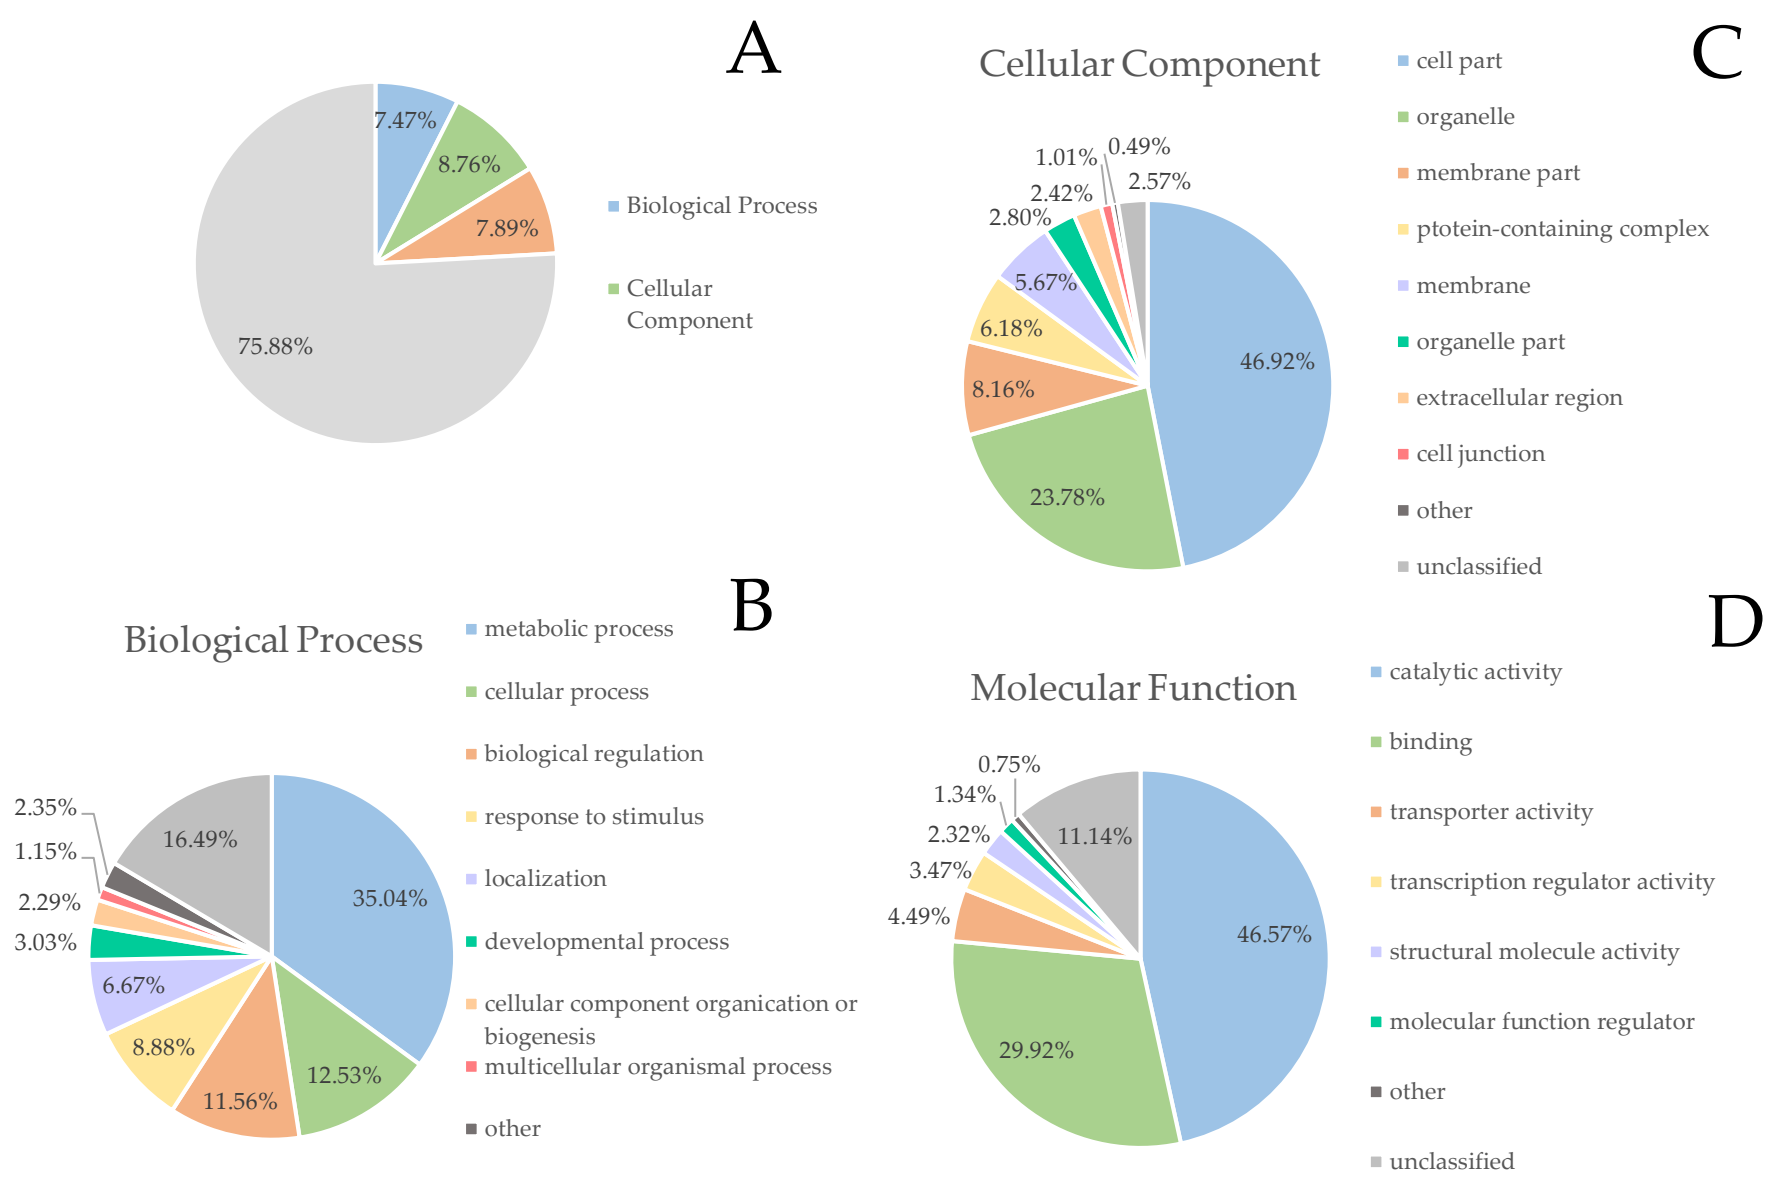

Figure S1. Gene Ontology (GO) annotation of the assembled two lisianthus cultivars. All GO terms are grouped into three ontology (**A**) List of the GO terms belonging to biological process (**B**) List of the GO terms belonging to cellular component (**C**) List of the GO terms belonging to molecular function (**D**)
